# Supplementary material for: High-Efficient Production of Boron Nitride Nanosheets via an Optimized Ball Milling Process for Lubrication in Oil
Source: PubMed Central journal article supplement — Sci Rep. 2014 Dec 3;4:7288. doi: 10.1038/srep07288 (PMC5384281; doi:10.1038/srep07288), 2014-12-03
Supplement: srep07288-s1.pdf [file srep07288-s1.pdf]

## Supplementary Information

# High-Efficient Production of Boron Nitride Nanosheets via an Optimized Ball Milling Process for Lubrication in Oil

Deepika,<sup>1,2</sup> Lu Hua Li,<sup>1\*</sup> Alexey M. Glushenkov,<sup>1,3</sup> Samik K. Hait,<sup>2</sup> Peter Hodgson<sup>1</sup> & Ying Chen<sup>1\*</sup>

<sup>1</sup>Institute for Frontier Materials, Deakin University, Geelong Waurn Ponds Campus, Victoria 3216, Australia.

<sup>2</sup>Indian Oil Corporation Limited, R&D Centre, Sector 13, Faridabad, Haryana 121007, India.

<sup>3</sup>Melbourne Centre for Nanofabrication, 151 Wellington Rd, Clayton, VIC 3168, Australia

### 1. Raman spectroscopy

Figure S1 shows the Raman spectra from starting h-BN powder and BN nanosheets after ball milling at 800 rpm using 0.1-0.2 mm balls at a ball-to-powder ratio of 10:1 for 10 h. Raman analysis of the prepared dispersion was performed on STR 750 Confocal Dispersive Micro Raman Spectrometer equipped with 633nm Ar laser (70mW) and Princeton Instruments Acton SP2750 Spectrograph having a  $1.4\text{cm}^{-1}$  dispersive pixel resolution.

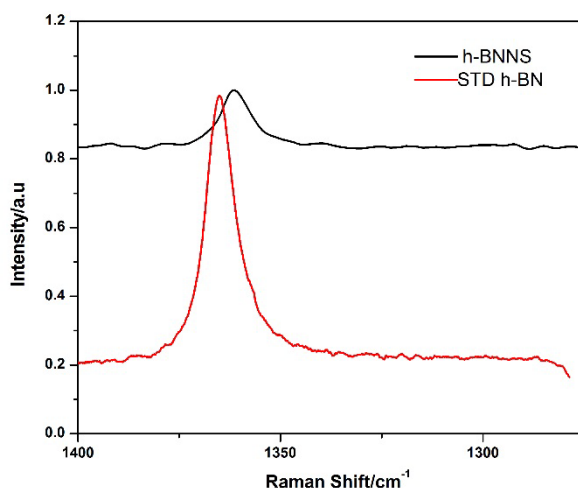

Figure S1. Raman spectra of the BN before and after ball milling treatment.

### 2. Statistics of the size of the BN nanosheets

Figure S2 shows the statistics of the diameters of the BN nanosheets produced by ball milling at 800 rpm using 0.1-0.2 mm balls at a ball-to-powder ratio of 10:1 for 10 h. It shows that most of the nanosheets have a diameter between 1.0 and 1.5  $\mu\text{m}$  and a small portion of the nanosheets is less than 0.6  $\mu\text{m}$ .

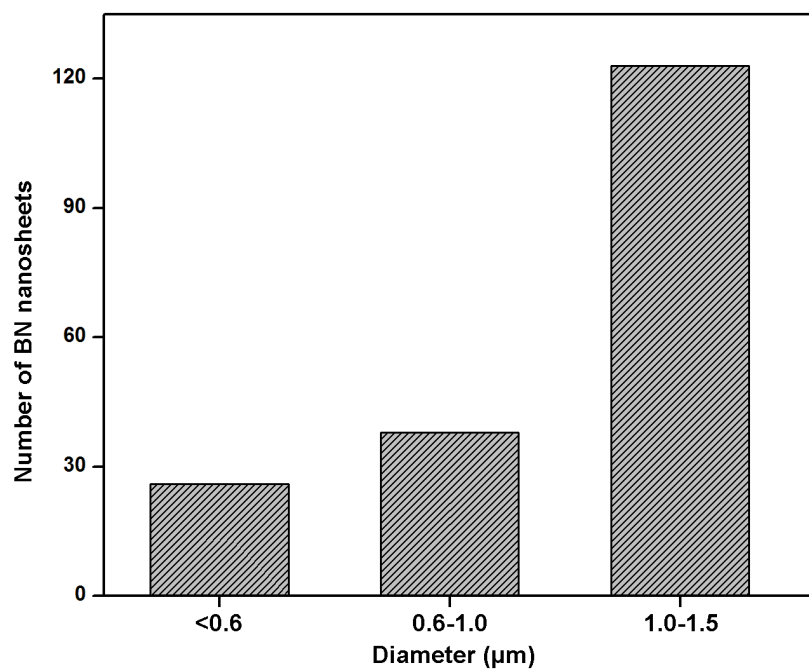

Figure S2. Statistics of the size of the BN nanosheets.
